# Supplementary material for: Mycobacterial Phylogenomics: An Enhanced Method for Gene Turnover Analysis Reveals Uneven Levels of Gene Gain and Loss among Species and Gene Families
Source: PubMed Central journal article supplement (PMC4079203; doi:10.1093/gbe/evu117), 2014-06-05
Supplement: supp_evu117_TableS1.pdf [file supp_evu117_TableS1.pdf]

**Table S1.** Data sets used for the analyses

| <b>Data set</b> | <b>Analysis</b>             | <b>Genomes</b>                                                             | <b>Markers and data information</b>                                                                                                                                                  |
|-----------------|-----------------------------|----------------------------------------------------------------------------|--------------------------------------------------------------------------------------------------------------------------------------------------------------------------------------|
| <b>Myc19</b>    | Phylogenetic reconstruction | The 19 mycobacteria proteomes ( $n = 19$ )<br><br><a href="#">Data Set</a> | Concatenation of 1,011 aligned protein sequences (1:1 orthologs; 364,491 amino acid positions)<br><br><a href="#">Data Set</a><br><a href="#">MYC amino acid substitution matrix</a> |
| <b>Myc18</b>    | Gain and death analysis     | The Myc19 data set, excluding <i>M. abscessus</i> ( $n = 18$ )             | 14,108 ortholog groups (or gene families; N:N and N:M relationships)                                                                                                                 |
